# Supplementary material for: Fast response/recovery and sub-ppm ammonia gas sensors based on a novel V2CTx@MoS2 composite
Source: Royal Society of Chemistry journal article supplement (doi:10.1039/d4ta00842a), 2024-01-01
Supplement: d4ta00842a1.pdf [file d4ta00842a1.pdf]

## Supplementary Information

### **Fast response/recovery and sub-ppm ammonia gas sensors based on a novel $V_2CT_x@MoS_2$ composite**

Manyu Luo<sup>a,b</sup>, Xingpeng Huang<sup>a,b</sup>, Deshou Xiong<sup>a,b</sup>, Sijin Cai<sup>b</sup>, Shuang Li<sup>b\*</sup>,  
Zhenhong Jia<sup>a\*</sup> and Zhixian Gao<sup>b\*</sup>

<sup>a</sup>School of Information Science and Engineering, Xinjiang University, Urumqi 830046, China

<sup>b</sup>Tianjin Key Laboratory of Risk Assessment and Control Technology for Environment and Food Safety, Tianjin Institute of Environment and Operational Medicine, Tianjin 300050, China

\*Corresponding authors.

E-mail:

liza3320@163.com(Shuang Li)

jzhh@xju.edu.cn(Zhenhong Jia)

gaozhx@163.com(Zhixian Gao)

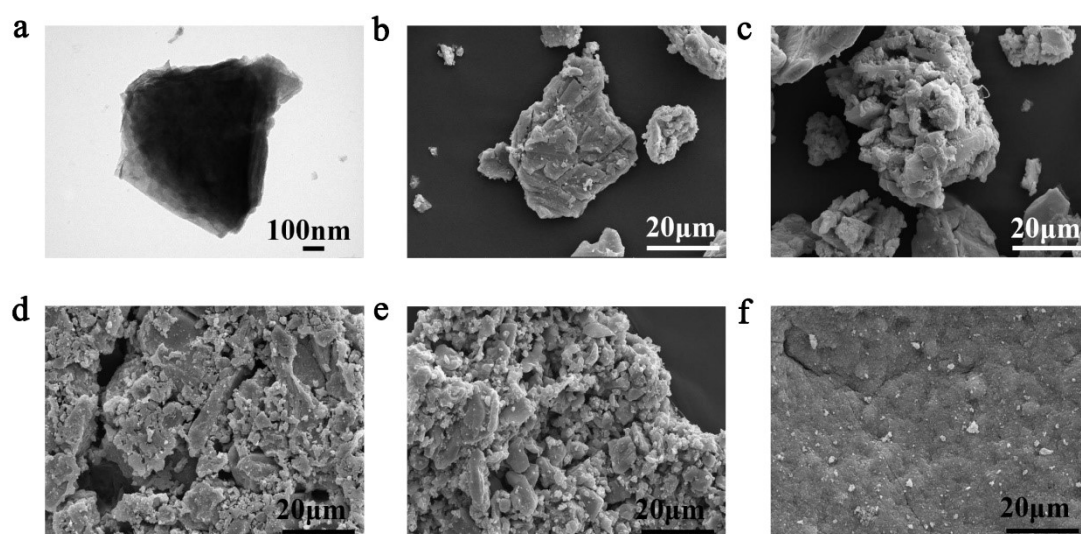

**Fig. S1** Topography of synthetic materials. a) TEM image of  $V_2CT_x$ . b-f) SEM images of  $V_2CT_x@MoS_2$  composite materials. b)  $V_2CT_x@MoS_2-0.5$ , c)  $V_2CT_x @MoS_2-0.75$ , d)  $V_2CT_x @MoS_2-1$ , e)  $V_2CT_x @MoS_2-2$  and f)  $V_2CT_x @MoS_2- 4$ .

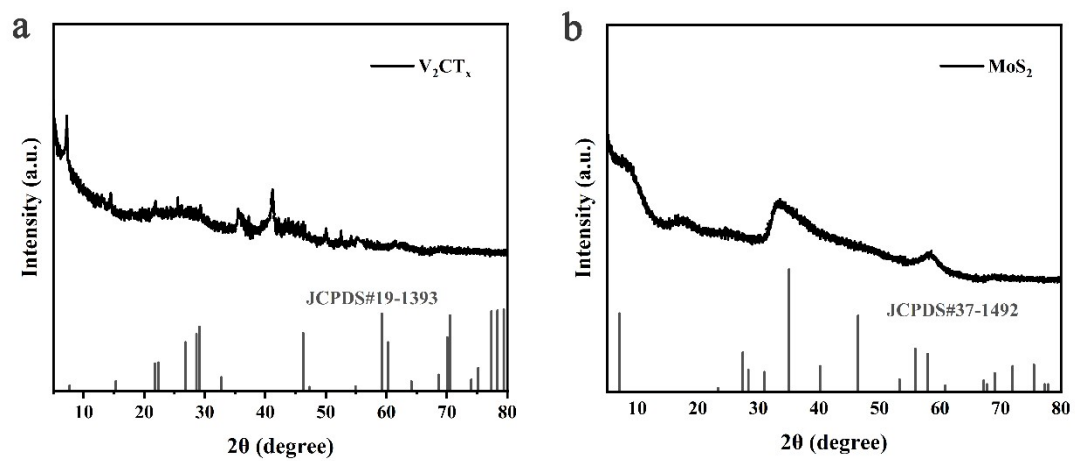

**Fig. S2** Spectra of synthesized samples with labeled standard XRD cards. a)  $V_2CT_x$ , b)  $MoS_2$ .

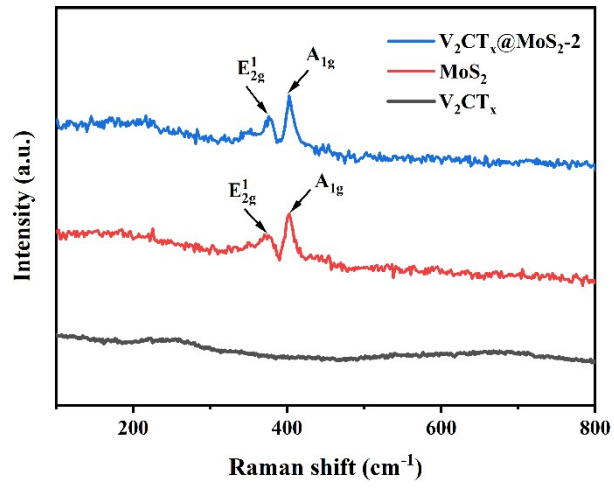

**Fig. S3** Raman spectra of V<sub>2</sub>CT<sub>x</sub>, MoS<sub>2</sub>, and V<sub>2</sub>CT<sub>x</sub>@MoS<sub>2</sub>-2.

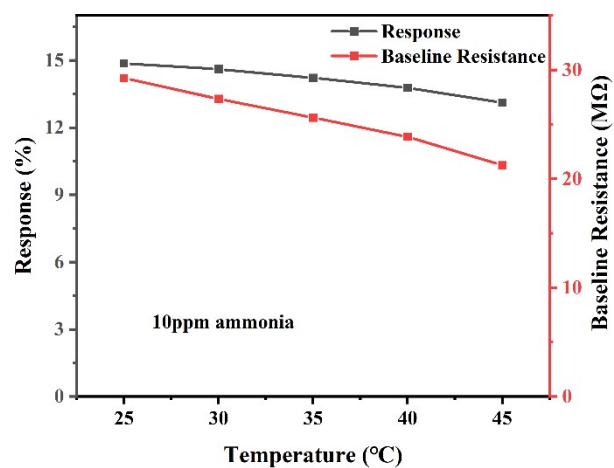

**Fig. S4** Response and baseline resistance of  $V_2CT_x@MoS_2$  based sensors to 10 ppm ammonia at different temperatures.

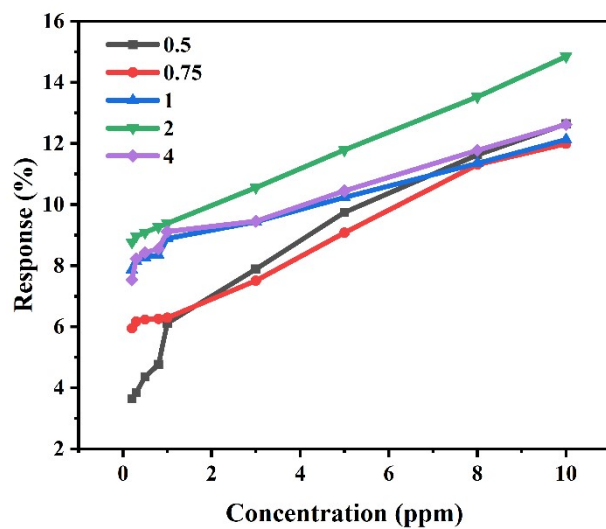

**Fig. S5** Comparison line plot of the response of  $V_2CT_x @ MoS_2$  composites with different mass ratios in the range of ammonia concentrations from 0.2 to 10 ppm.

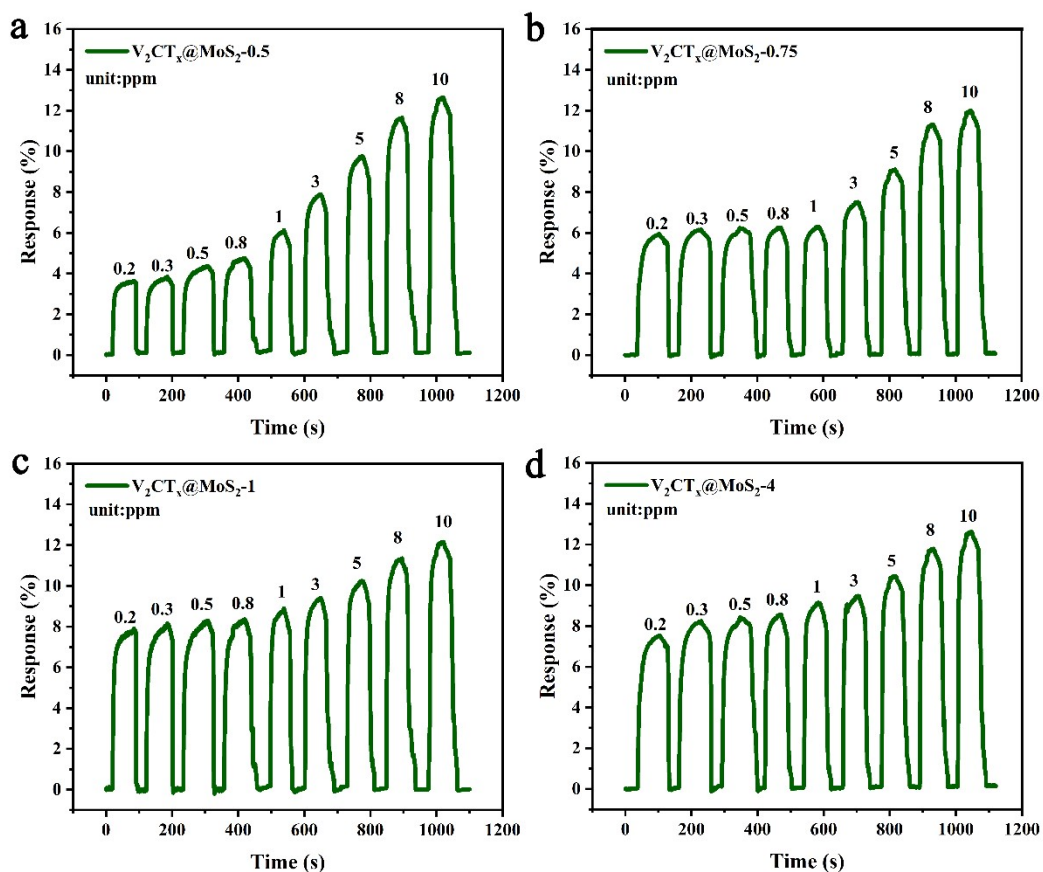

**Fig. S6** Sensing performance test of  $V_2CT_x$  and  $MoS_2$  composite sensors with different masses at room temperature within 0.2-10ppm concentration and at 43% relative humidity. a)  $V_2CT_x@MoS_2-0.5$ , b)  $V_2CT_x@MoS_2-0.75$ , c)  $V_2CT_x@MoS_2-1$  and d)  $V_2CT_x@MoS_2-4$ .

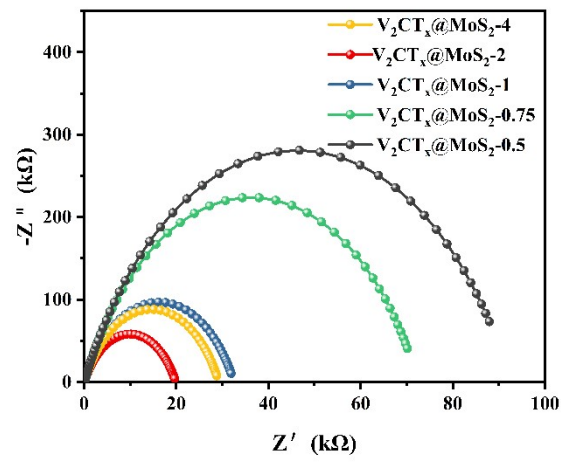

**Fig. S7** Nyquist diagram of V<sub>2</sub>CT<sub>x</sub> and MoS<sub>2</sub> composites at different mass ratios.



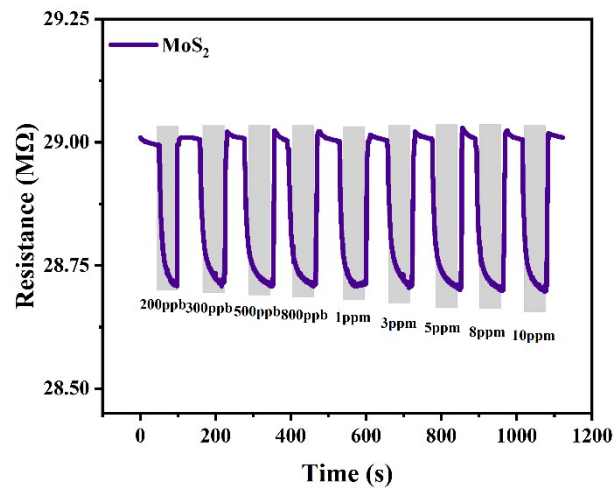

**Fig. S8** Variation in resistance of a pure MoS<sub>2</sub> sensor at different ammonia concentrations at room temperature.

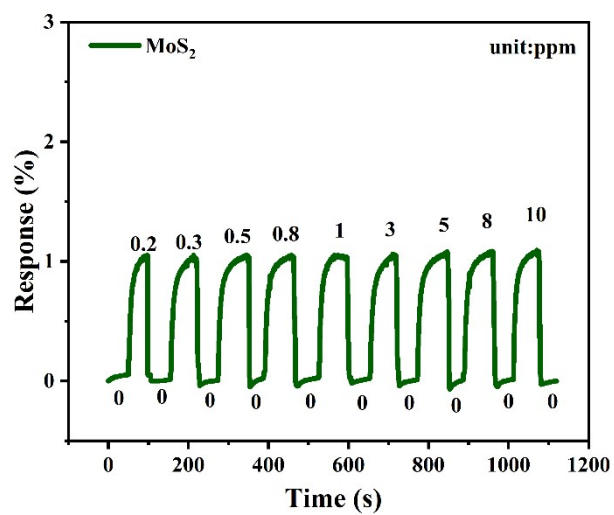

**Fig. S9** Dynamic response of a pure MoS<sub>2</sub> sensor at different ammonia concentrations at room temperature.

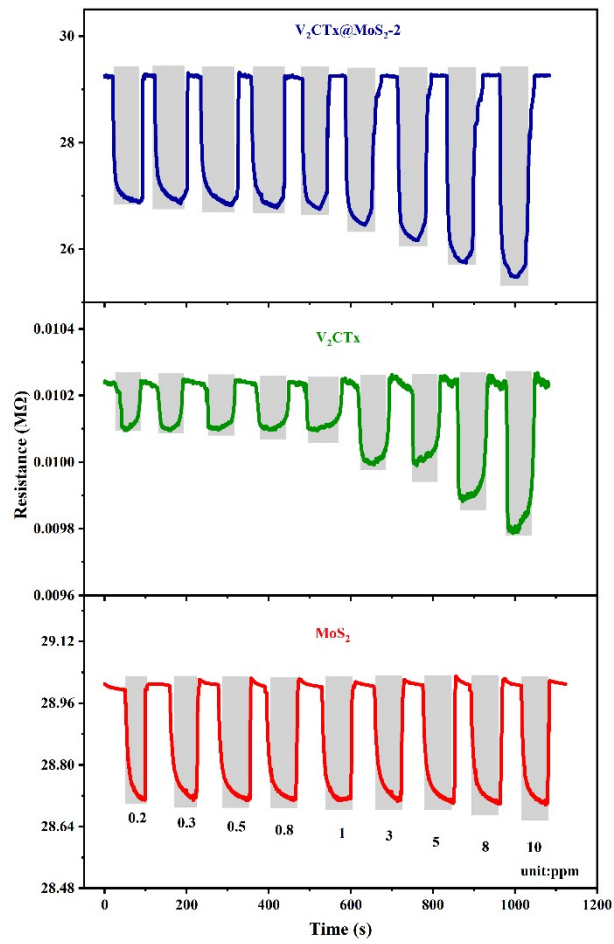

**Fig. S10** Comparison of the resistance of pure MoS<sub>2</sub> sensor, pure V<sub>2</sub>CT<sub>x</sub> sensor and V<sub>2</sub>CT<sub>x</sub>@MoS<sub>2</sub>-2 sensor with ammonia concentration.

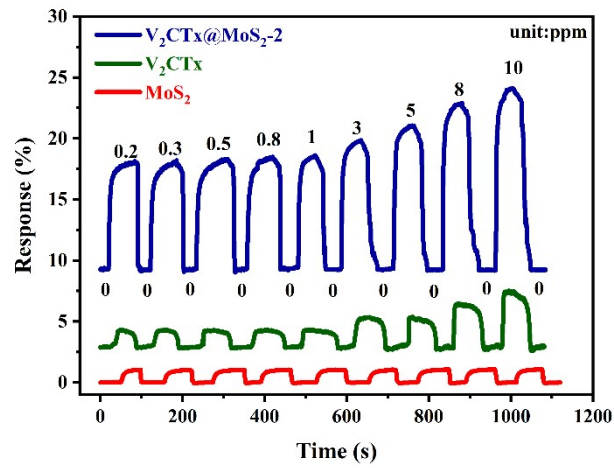

**Fig. S11** Comparison of the responses of pure  $MoS_2$  sensors, pure  $V_2CT_x$  sensors and  $V_2CT_x@MoS_2-2$  sensors with ammonia concentration.

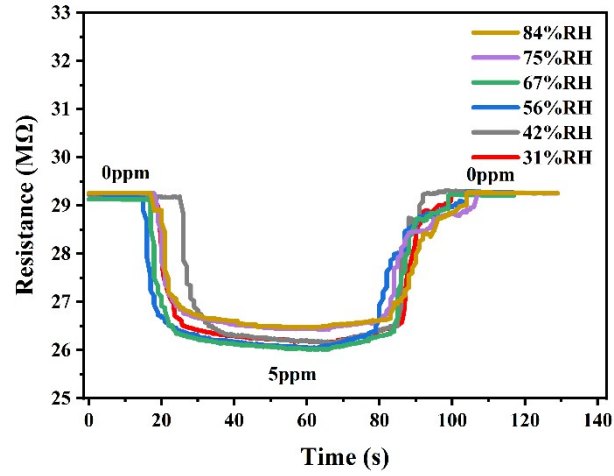

**Fig. S12** Variation of resistance of  $V_2CT_x@MoS_2-2$  composite sensor at room temperature under different humidity.

## Computational details

Spin-polarized DFT calculations were performed using the Vienna *ab initio* simulation package (VASP) code<sup>1, 2</sup>. The projector augmented wave method (PAW) and the Perdew–Burke–Ernzerhof (PBE) exchange–correlation function were performed to describe both valence electron and core interactions<sup>3, 4</sup>. A plane wave basis with a kinetic cut-off energy of 450 eV was utilized. All structures were fully optimized until energy and residual force convergence criteria of  $10^{-5}$  eV and 0.03 eV/Å were met. The DFT-D3 method<sup>5</sup> was utilized for accurate estimation of adsorption strength. Sampling was conducted using a  $1 \times 1 \times 1$  Monkhorst-Pack grid for general calculations, while a dense  $3 \times 3 \times 1$  Monkhorst-Pack grid was employed for electronic property calculations.

The difference in charge density is defined as  $\Delta\rho = \rho_{*mol} - \rho_* - \rho_{mol}$ , where  $\rho_{*mol}$ ,  $\rho_*$ , and  $\rho_{mol}$  represent the electron densities of the slab with the adsorbed molecule (including  $\text{NH}_3$ ,  $\text{CH}_2\text{O}$ ,  $\text{CH}_3\text{OH}$ , and  $\text{CH}_3\text{COCH}_3$ ), the isolated slab, and the isolated molecule, respectively. Additionally, the adsorption energy  $E_{ads}$  per molecule is defined as  $E_{ads} = E_{*mol} - E_* - E_{mol}$ , where  $E_{*mol}$  stands for the energy of the monolayer with the adsorbed molecule,  $E_*$  is the energy of a clear monolayer, and  $E_{mol}$  is the energy of an isolated molecule under vacuum.

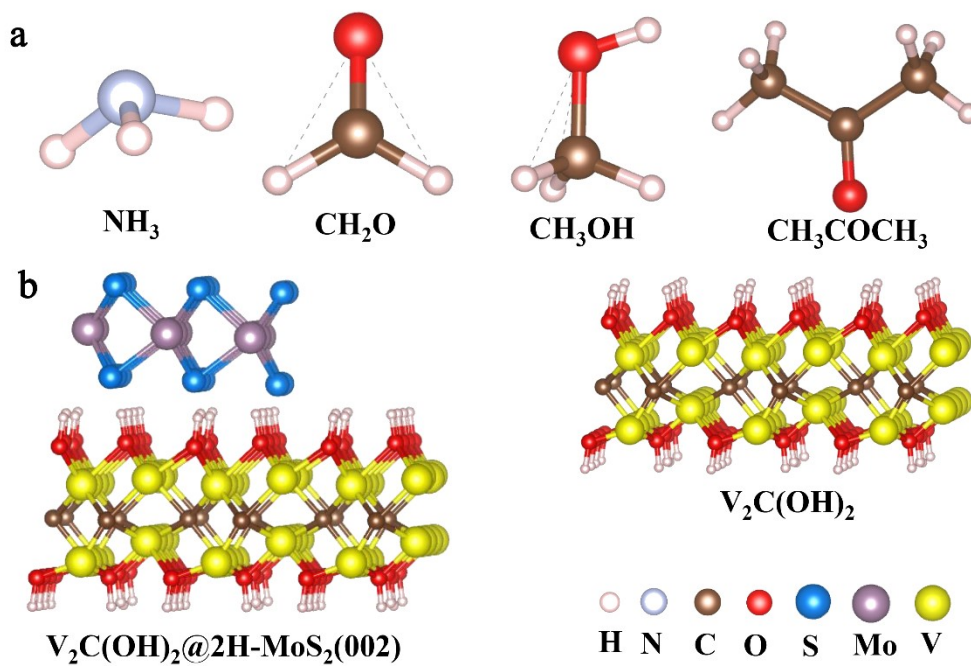

**Fig.S13** a) The constructed initial models of ammonia (NH<sub>3</sub>), acetone (C<sub>3</sub>H<sub>6</sub>O), methanol (CH<sub>4</sub>O) and formaldehyde (CH<sub>2</sub>O), b) V<sub>2</sub>C(OH)<sub>2</sub> and V<sub>2</sub>C(OH)<sub>2</sub>@2H-MoS<sub>2</sub>(002).

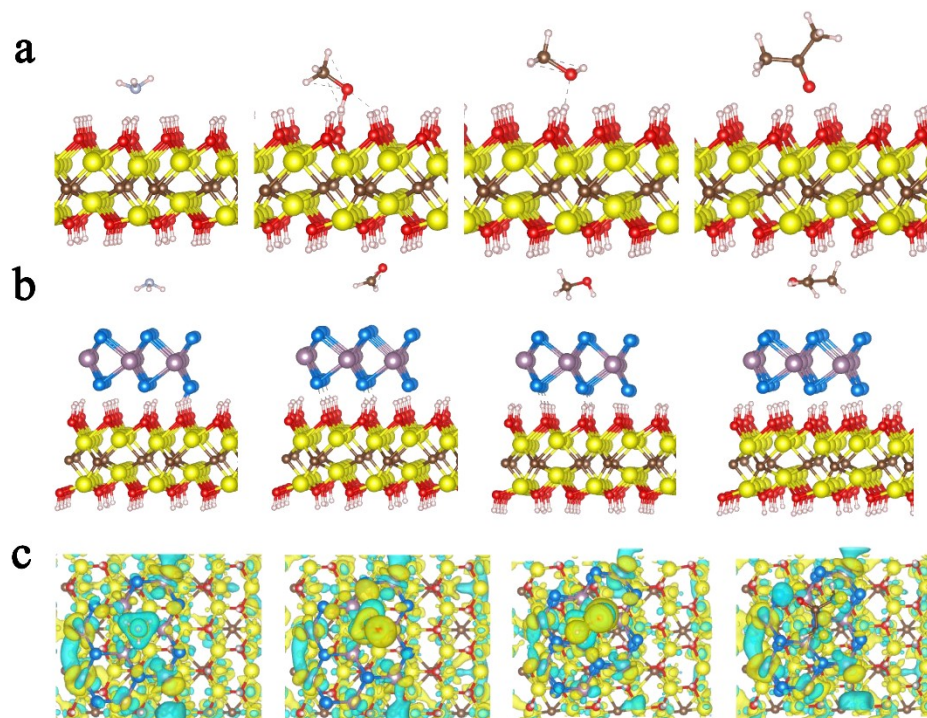

**Fig.S14** Model diagram of a)  $V_2C(OH)_2$  adsorbed ammonia ( $NH_3$ ), acetone ( $C_3H_6O$ ), methanol ( $CH_4O$ ) and formaldehyde ( $CH_2O$ ) molecules, b)  $V_2C(OH)_2@MoS_2$  adsorbed ammonia ( $NH_3$ ), acetone ( $C_3H_6O$ ), methanol ( $CH_4O$ ) and formaldehyde ( $CH_2O$ ) molecules, c) Difference in charge density of  $V_2C(OH)_2@MoS_2$  model with ammonia, acetone, methanol, and formaldehyde molecules.



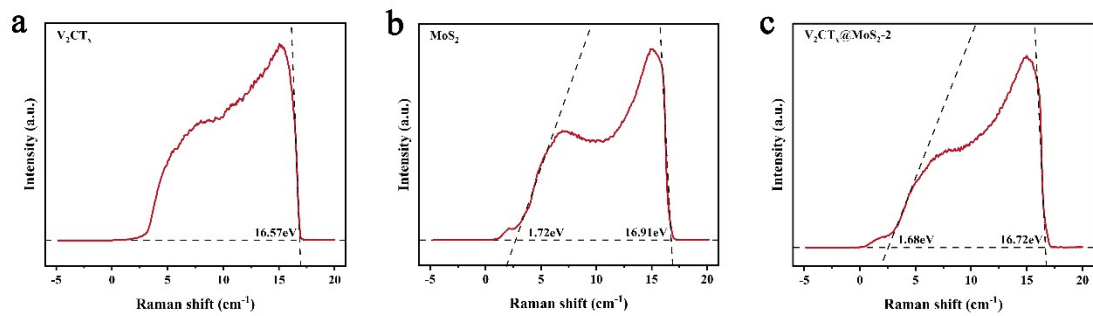

**Fig.S15** UPS spectra of a) V<sub>2</sub>CT<sub>x</sub>, b) MoS<sub>2</sub>, c) V<sub>2</sub>CT<sub>x</sub>@MoS<sub>2</sub>-2.

Table S1. Comparison of the performance of the proposed sensor and previously reported ammonia sensors

| Material                                                                             | Detection range (ppm) | LOD (ppm) | Response time(s) | Recovery time(s) | Sensitivity      | Ref.         |
|--------------------------------------------------------------------------------------|-----------------------|-----------|------------------|------------------|------------------|--------------|
| Nb <sub>2</sub> CT <sub>x</sub><br>/PANI                                             | 1-100                 | 1         | 105s@<br>10ppm   | 143s@<br>10ppm   | 9.3%@<br>1ppm    | 6            |
| Ti <sub>3</sub> C <sub>2</sub> T <sub>x</sub><br>/SnO <sub>2</sub>                   | 0.5-100               | 0.5       | 36s@<br>50ppm    | 44s@<br>50ppm    | -                | 7            |
| MoS <sub>2</sub> @<br>MoO <sub>3</sub>                                               | 1-50                  | 1         | 45s@<br>50ppm    | 53 s@<br>50ppm   | -                | 8            |
| Ti <sub>3</sub> C <sub>2</sub> T <sub>x</sub> /TiO <sub>2</sub><br>/MoS <sub>2</sub> | 10-800                | 0.5       | 117s@<br>100ppm  | 88s@<br>100ppm   | 6.31%@<br>100ppm | 9            |
| PANI/Pt<br>/MoS <sub>2</sub>                                                         | 1-500                 | 0.25      | 15s@<br>50ppm    | 103s@<br>50ppm   | 16.64%@<br>50ppm | 10           |
| MoS <sub>2</sub><br>/graphene                                                        | 25-500                | 0.72      | 80s@<br>200ppm   | 70s@<br>200ppm   | 40%@<br>200ppm   | 11           |
| Ti <sub>3</sub> C <sub>2</sub> T <sub>x</sub><br>/graphene                           | 10-100                | 10        | -                | -                | 7.2%@<br>100ppm  | 12           |
| PANI<br>/MWCNTs<br>/MoS <sub>2</sub>                                                 | 0.25-20               | 0.25      | 32s@<br>0.25ppm  | 36s@<br>0.25ppm  | -                | 13           |
| V <sub>2</sub> CT <sub>x</sub> @MoS <sub>2</sub>                                     | 0.2-1                 | 0.129     | 9.82s@<br>1ppm   | 24.22s@<br>1ppm  | 8.71%@<br>0.2ppm | This<br>work |

Table S2 Comparison of this study with previously reported ammonia sensors in terms of response values

| Materials                                                       | Response     | Year published | Ref. |
|-----------------------------------------------------------------|--------------|----------------|------|
| Ti <sub>3</sub> C <sub>2</sub>                                  | 2%@50ppm     | 2019           | 14   |
| rGO/ZnO                                                         | 3.05%@50ppm  | 2016           | 15   |
| Ti <sub>3</sub> C <sub>2</sub> T <sub>x</sub> @TiO <sub>2</sub> | 3.1%@10ppm   | 2019           | 16   |
| PANI/rGO                                                        | 13%@15ppm    | 2019           | 17   |
| NiWO <sub>4</sub> /MWCNTs                                       | 13.07%@50ppm | 2021           | 18   |
| SWCNT/PPY/PA                                                    | 2.2%@1ppm    | 2020           | 19   |
| PEDOT:PSS/N-MXene                                               | 13%@10ppm    | 2021           | 20   |
| Ti <sub>3</sub> C <sub>2</sub> T <sub>x</sub> /PVDF-ZIF-67      | 4.7%@25ppm   | 2024           | 21   |

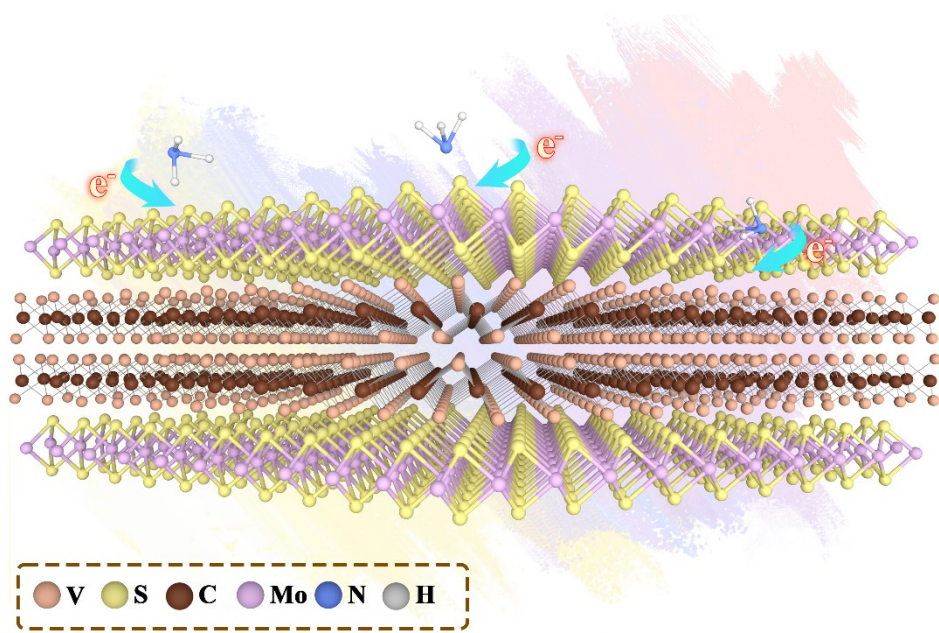

**Fig. S16** Gas sensing mechanism toward NH<sub>3</sub> gas for the V<sub>2</sub>CT<sub>x</sub>@MoS<sub>2</sub> nanohybrid.

## References

1. G. Kresse and J. Furthmuller, *Phys Rev B Condens Matter*, 1996, **54**, 11169-11186.
2. J. Hafner, *J Comput Chem*, 2008, **29**, 2044-2078.
3. J. P. Perdew, K. Burke and M. Ernzerhof, *Phys Rev Lett*, 1996, **77**, 3865-3868.
4. G. Kresse and D. Joubert, *Physical Review B*, 1999, **59**, 1758-1775.
5. S. Grimme, J. Antony, S. Ehrlich and H. Krieg, *J Chem Phys*, 2010, **132**, 154104.
6. S. Wang, B. Liu, Z. Duan, Q. Zhao, Y. Zhang, G. Xie, Y. Jiang, S. Li and H. Tai, *Sensors and Actuators B: Chemical*, 2021, **327**,128923.
7. T. He, W. Liu, T. Lv, M. Ma, Z. Liu, A. Vasiliev and X. Li, *Sensors and Actuators B: Chemical*, 2021, **329**,129275.
8. S. Singh, J. Deb, U. Sarkar and S. Sharma, *ACS Sustainable Chemistry & Engineering*, 2021, **9**, 7328-7340.
9. X. Tian, L. Yao, X. Cui, R. Zhao, T. Chen, X. Xiao and Y. Wang, *Journal of Materials Chemistry A*, 2022, **10**, 5505-5519.
10. X. Tian, X. Cui, Y. Xiao, T. Chen, X. Xiao and Y. Wang, *ACS Applied Materials & Interfaces*, 2023, **15**, 9604-9617.
11. A. Jian, J. Wang, H. Lin, S. Xu, D. Han, Z. Yuan and K. Zhuo, *ACS Omega*, 2022, **7**, 11664-11670.
12. S. H. Lee, W. Eom, H. Shin, R. B. Ambade, J. H. Bang, H. W. Kim and T. H. Han, *ACS Applied Materials & Interfaces*, 2020, **12**, 10434-10442.
13. D. Zhang, Z. Wu, P. Li, X. Zong, G. Dong and Y. Zhang, *Sensors and Actuators B: Chemical*, 2018, **258**, 895-905.
14. M. Wu, M. He, Q. Hu, Q. Wu, G. Sun, L. Xie, Z. Zhang, Z. Zhu and A. Zhou, *ACS Sensors*, 2019, **4**, 2763-2770.
15. H. Tai, Z. Yuan, W. Zheng, Z. Ye, C. Liu and X. Du, *Nanoscale Research Letters*, 2016, **11**, 1-8.
16. H. Tai, Z. Duan, Z. He, X. Li, J. Xu, B. Liu and Y. Jiang, *Sensors and Actuators B: Chemical*, 2019, **298**,126874.
17. C.-T. Lee and Y.-S. Wang, *Journal of Alloys and Compounds*, 2019, **789**, 693-696.
18. M. Yang, C. Au, G. Deng, S. Mathur, Q. Huang, X. Luo, G. Xie, H. Tai, Y. Jiang, C. Chen, Z. Cui, X. Liu, C. He, Y. Su and J. Chen, *ACS Applied Materials & Interfaces*, 2021, **13**, 52850-52860.
19. W. Xuan Du, H.-J. Lee, J.-H. Byeon, J.-S. Kim, K.-S. Cho, S. Kang, M. Takada and J.-Y. Kim, *Journal of Materials Chemistry C*, 2020, **8**, 15609-15615.
20. J. Qiu, X. Xia, Z. Hu, S. Zhou, Y. Wang, Y. Wang, R. Zhang, J. Li and Y. Zhou, *Nanotechnology*, 2021, **33**,065501.
21. N. K. Arkoti and K. Pal, *ACS Sensors*, 2024, DOI: 10.1021/acssensors.3c02551.
